# Supplementary material for: Neutrophil-to-lymphocyte ratio as a prognostic biomarker for patients with locally advanced esophageal squamous cell carcinoma treated with definitive chemoradiotherapy
Source: PubMed Central journal article supplement (PMC5307338; doi:10.1038/srep42581), 2017-02-14
Supplement: srep42581-s1.pdf [file srep42581-s1.pdf]

## Supplementary information

### **Neutrophil-to-lymphocyte ratio as a prognostic biomarker for patients with locally advanced esophageal squamous cell carcinoma treated with definitive chemoradiotherapy**

Xi-Lei Zhou<sup>1†</sup>, Yong-Qiang Li<sup>2†</sup>, Wei-Guo Zhu<sup>1</sup>, Chang-Hua Yu<sup>1</sup>, Ya-Qi Song<sup>1</sup>, Wan-Wei Wang<sup>1</sup>, Dong-Cheng He<sup>1</sup>,  
Guang-Zhou Tao<sup>1</sup>, Yu-Suo Tong<sup>1\*</sup>

<sup>†</sup>Xi-Lei Zhou and <sup>†</sup>Yong-Qiang Li contributed equally to this work and should be considered as joint first authors

\*Correspondence to: Yu-Suo Tong, Email: tongyusuo@163.com

<sup>1</sup>Department of Radiation Oncology, Huai'an First People's Hospital, Nanjing Medical University, Huai'an, Jiangsu, China

<sup>2</sup>Cancer center, The Affiliated Hospital of Hang Zhou Normal University, Hangzhou, Zhejiang, China

Xi-Lei Zhou: zhouxilei1226@163.com

Yong-Qiang Li: liyongqiang19701217@126.com

Wei-Guo Zhu: jshazwg@126.com

Chang-Hua Yu: yu884443@sina.com

Ya-Qi Song: [songaqi@163.com](mailto:songaqi@163.com)

Wan-Wei Wang: [wly1019@126.com](mailto:wly1019@126.com)

Dong-Cheng He : [hdcuda@163.com](mailto:hdcuda@163.com)

Guang-Zhou Tao: [taoguangzhou01@163.com](mailto:taoguangzhou01@163.com)

Yu-Suo Tong: [tongyusuo@163.com](mailto:tongyusuo@163.com)

SUPPLEMENTARY TABLE

Table S1. Univariate analysis with potential variables predicting tumor response to definitive chemoradiotherapy.

| Variables            | Case | Effective<br>(CR+PR) | Resistant<br>(PD+SD) | OR    | 95% CI      | <i>p</i> value |
|----------------------|------|----------------------|----------------------|-------|-------------|----------------|
| Age                  |      |                      |                      | 0.953 | 0.597-1.522 | 0.840          |
| ≤60                  | 85   | 47                   | 38                   |       |             |                |
| >60                  | 432  | 244                  | 188                  |       |             |                |
| Gender               |      |                      |                      | 0.950 | 0.621-1.454 | 0.814          |
| Male                 | 407  | 228                  | 179                  |       |             |                |
| Female               | 110  | 63                   | 47                   |       |             |                |
| Smoking at diagnosis |      |                      |                      | 1.100 | 0.767-1.578 | 0.604          |
| Never smoker         | 329  | 188                  | 141                  |       |             |                |
| Current or ex-smoker | 188  | 103                  | 85                   |       |             |                |

|                             |     |     |     |       |             |       |
|-----------------------------|-----|-----|-----|-------|-------------|-------|
| ECOG PS at diagnosis        |     |     |     | 1.252 | 0.862-1.820 | 0.238 |
| 0-1                         | 355 | 206 | 149 |       |             |       |
| $\geq 2$                    | 162 | 85  | 77  |       |             |       |
| Tumor location              |     |     |     | 1.557 | 0.813-2.980 | 0.181 |
| Proximal third              | 44  | 29  | 15  |       |             |       |
| Middle third + Distal third | 473 | 262 | 211 |       |             |       |
| Tumor length (cm)           |     |     |     | 1.003 | 0.706-1.424 | 0.988 |
| < 5                         | 293 | 165 | 128 |       |             |       |
| $\geq 5$                    | 224 | 126 | 98  |       |             |       |
| Tumor differentiation       |     |     |     | 0.929 | 0.549-1.572 | 0.783 |
| Well                        | 64  | 35  | 29  |       |             |       |
| Moderate + Poor             | 453 | 256 | 197 |       |             |       |
| Node stage                  |     |     |     | 1.154 | 0.800-1.663 | 0.444 |

---

|                           |     |     |     |       |             |       |
|---------------------------|-----|-----|-----|-------|-------------|-------|
| N0                        | 181 | 106 | 75  |       |             |       |
| N1                        | 336 | 185 | 151 |       |             |       |
| Metastasis stage          |     |     |     | 1.620 | 0.932-2.817 | 0.087 |
| M0                        | 460 | 265 | 195 |       |             |       |
| M1-lym                    | 57  | 26  | 31  |       |             |       |
| Tumor stage               |     |     |     | 0.959 | 0.598-1.538 | 0.862 |
| II                        | 83  | 46  | 37  |       |             |       |
| III+ IV                   | 434 | 245 | 189 |       |             |       |
| SCCA at diagnosis (ng/ml) |     |     |     | 1.369 | 0.963-1.948 | 0.080 |
| < 1.5                     | 226 | 137 | 89  |       |             |       |
| ≥ 1.5                     | 291 | 154 | 137 |       |             |       |
| CEA at diagnosis (ng/ml)  |     |     |     | 1.139 | 0.791-1.640 | 0.484 |
| < 5                       | 338 | 194 | 144 |       |             |       |

---

---

|                        |     |     |     |       |             |         |
|------------------------|-----|-----|-----|-------|-------------|---------|
| $\geq 5$               | 179 | 97  | 82  |       |             |         |
| Radiotherapy dose (Gy) |     |     |     | 1.124 | 0.769-1.644 | 0.545   |
| 60                     | 364 | 208 | 156 |       |             |         |
| > 60                   | 153 | 83  | 70  |       |             |         |
| Baseline NLR ratio     |     |     |     | 5.146 | 3.513-7.538 | < 0.001 |
| < 5                    | 313 | 224 | 89  |       |             |         |
| $\geq 5$               | 204 | 67  | 137 |       |             |         |

---

Abbreviations: OR: odds ratio, CI: confidence interval, M1-lym: distant lymph node metastasis,, CR: complete response, PR: partial response, SD: stable disease, PD: progressive disease.
